# Supplementary material for: Precise spatio-temporal control of rapid optogenetic cell ablation with mem-KillerRed in Zebrafish
Source: PubMed Central journal article supplement (PMC5506062; doi:10.1038/s41598-017-05028-2), 2017-07-11
Supplement: 41598_2017_5028_MOESM1_ESM.pdf [file 41598_2017_5028_MOESM1_ESM.pdf]

1 **Precise spatio-temporal control of rapid optogenetic cell ablation**  
2 **with mem-KillerRed in Zebrafish**

3  
4 Buckley CB<sup>1</sup>, Carvalho MT<sup>2</sup>, Young LK<sup>2</sup>, Rider S<sup>1</sup>, McFadden C<sup>1</sup>, Berlage C<sup>2</sup>,  
5 Verdon R<sup>2</sup>, Taylor J<sup>3</sup>, Girkin JM<sup>2</sup>, Mullins JJ<sup>1</sup>

6 1. BHF/University Centre for Cardiovascular Science

7 University of Edinburgh

8 Queen's Medical Research Institute

9 47 Little France Crescent

10 Edinburgh

11 EH16 4TJ

12 2. Biophysical Sciences Institute

13 Department of Physics

14 Durham University

15 South Road

16 Durham

17 DH1 3LE

18 3. School of Physics and Astronomy

19 University of Glasgow

20 Kelvin Building

21 Glasgow

22 G12 8QQ

23

24

25

26

27 **Supplementary Data**  
28

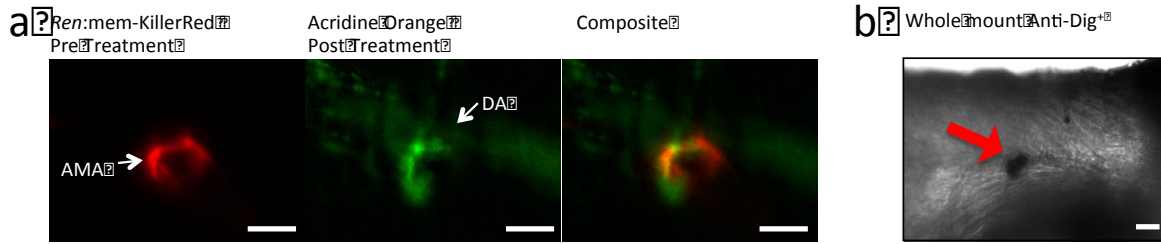

29 **Supplementary Figure 1:** Further staining to confirm cell death. (a) 3 dpf *ren:mem-KillerRed*  
30 fish were incubated in acridine orange (2 ng/ml) for 30 mins in the dark, followed by two 5  
31 mins washes and immediately imaged live on the SPIM. Treatment with the light-sheet was  
32 performed (1 hr, 4 mW, depth-stack every 10s) and the acridine orange fluorescence signal  
33 was collected post-treatment and a composite image was created. Treated KillerRed<sup>+</sup> cells  
34 can be seen to take up acridine orange readily. (b) A whole mount *in situ* protocol was  
35 performed with an anti-Dig<sup>+</sup> antibody, visualised using the colourant Nitro Blue Tetrazolium  
36 using the brightfield camera on the SPIM. Dig<sup>+</sup> cells are dark spots, as indicated with the red  
37 arrow. Scale bars represent 30  $\mu$ m.

38  
39

40 **Supplementary Video 1:** SPIM-illuminated KillerRed<sup>+</sup> targeting in live larval zebrafish.  
41 Representative example of a 3 dpf *ren:mem-KillerRed;kdr:GFP* fish illuminated using the  
42 SPIM light-sheet with a power of 3 mW (561 nm laser, 1 hr, depth stack acquired every 10 s).  
43 Images were acquired axially every 1  $\mu$ m across the dorsal aorta (DA) and KillerRed<sup>+</sup> AMA  
44 region, across approximately 80  $\mu$ m in depth. Fish were embedded in 0.5% agar and  
45 suspended between the perpendicularly-arranged objective lenses using FEP tubing. A  
46 maximum intensity projection of the depth stacks was performed for each timepoint, and form  
47 the frames of the time-lapse movie presented at 10 images per second. The scale bar  
48 represents 30  $\mu$ m.

49
